# Supplementary material
Source: PubMed Central journal article supplement (PMC5879663)
Supplement: pnas.1715903115.sapp.pdf [file pnas.1715903115.sapp.pdf]

## Supplemental Information Appendix

### ***Arabidopsis* TSO1 and MYB3R1 form a regulatory module to coordinate cell proliferation with differentiation in shoot and root**

Wanpeng Wang<sup>1,2</sup>, Paja Sijacic<sup>1#</sup>, Pengbo Xu<sup>3</sup>, Hongli Lian<sup>3</sup>, Zhongchi Liu<sup>1\*</sup>

1. Department of Cell Biology and Molecular Genetics, University of Maryland, College Park, United States.
2. Plant Science Graduate Program, University of Maryland, College Park, United States.
3. School of Agriculture and Biology, Shanghai Jiaotong University, Shanghai, China.

\*: Corresponding author

Zhongchi Liu ([zliu@umd.edu](mailto:zliu@umd.edu))

(301) 405-1586

#: Current address

Department of Biology, Emory University, Atlanta, United States

Key words: MYB3R1, DREAM complex, Cell cycle, meristem, TSO1

Short title: A cell cycle regulatory module in plant meristems

## Supplemental Figures

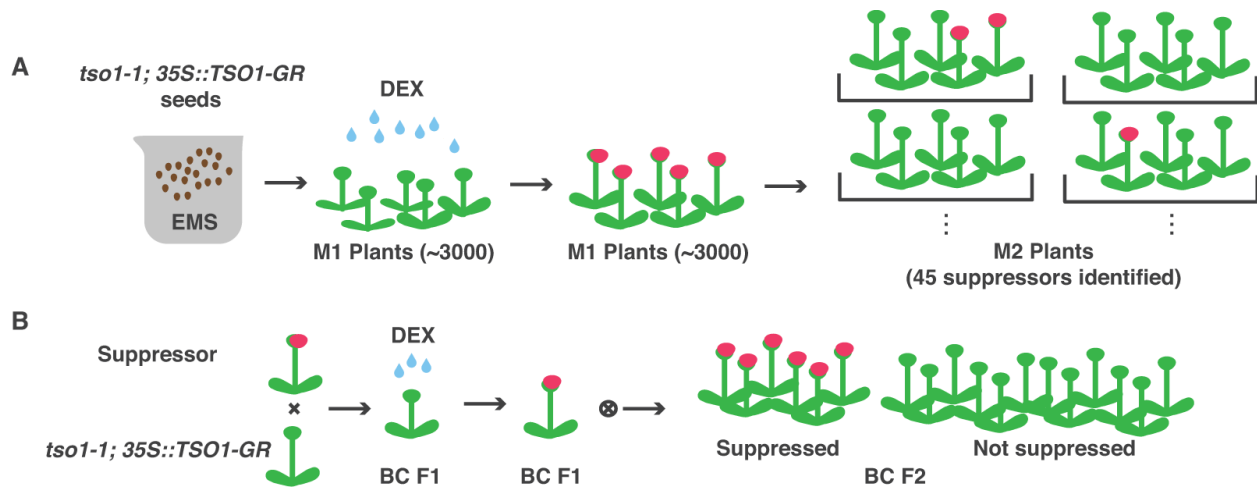

### Figure S1. Scheme of the suppressor screen and constructing the mapping population.

(A) *tso1-1; 35S::TSO1-GR* seeds were treated with EMS. Seeds were then germinated on soil. Since these M1 *tso1-1; 35S::TSO1-GR* plants were completely sterile, they were sprayed with DEX at bolting to give rise to M2 seeds. M2 plants derived from ~3000 M1 families were grown and screened for their ability to set seeds in the absence of DEX treatment. (B) Individual suppressor was back crossed with its wild type parent *tso1-1; 35S::TSO1-GR*. F1 cross progeny was supplied with DEX to set F2 seeds. F2 plants were scored and separated into suppressed and unsuppressed mapping populations. F2 plants showing suppressed phenotype were pooled and their DNA sequenced for identifying linked SNPs to the suppressor mutation. BC: Backcross. Red shoot apex denotes fertile flowers.

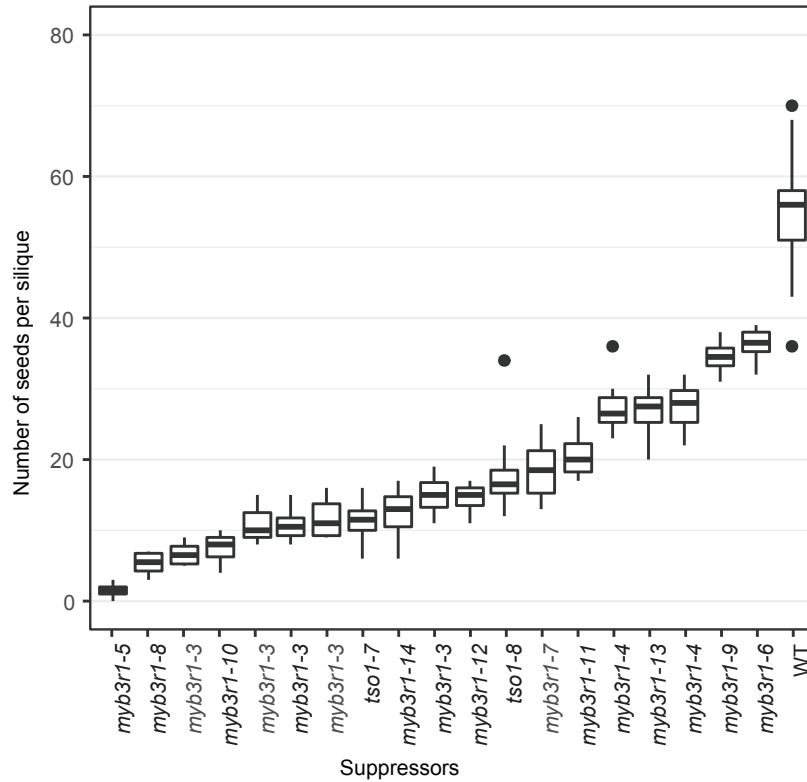

**Figure S2. Quantification of suppression based on the number of seeds produced per silique.**

Box plot of seeds per silique from WT (*Ler*) and 19 suppressors (17 new *myb3r1* alleles and 2 new *tso1* alleles). Multiple identical mutations were isolated and were denoted identical allele number. Background mutations may contribute to the extent of the suppression. Data ranked and ordered by median. Around 10 siliques were sampled from representative M3 suppressor plants.

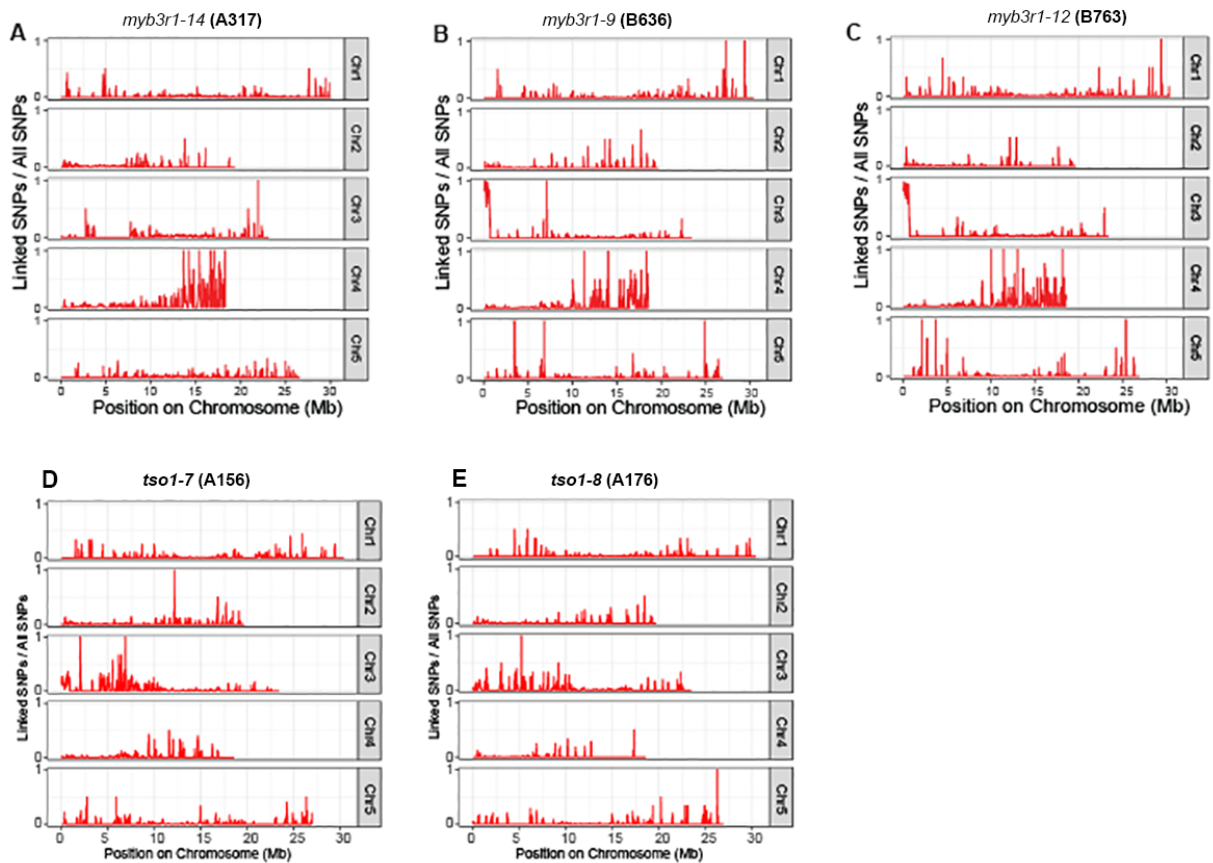

**Figure S3. Genome wide SNP mapping of five *tso1-1* suppressors identified two distinct loci.**

(A-C) Genome wide SNP mapping of F2 mapping populations for suppressor A317 (A), B636 (B), and B763 (C). Linked SNP peak in each case resides at the lower arm of *Arabidopsis* chromosome 4. In each of the three cases, a mutation was subsequently found in *MYB3R1*. (D-E) SNP mapping of F2 mapping population for suppressor A156 (D) and A176 (E). Both mapped to the top arm of chromosome 3. In each case, a mutation was found in the *TSO1* gene. Y-axis indicates the ratio of linked SNPs to all SNPs detected in a 100,000bp sliding window. X-axis denotes position on the chromosome.

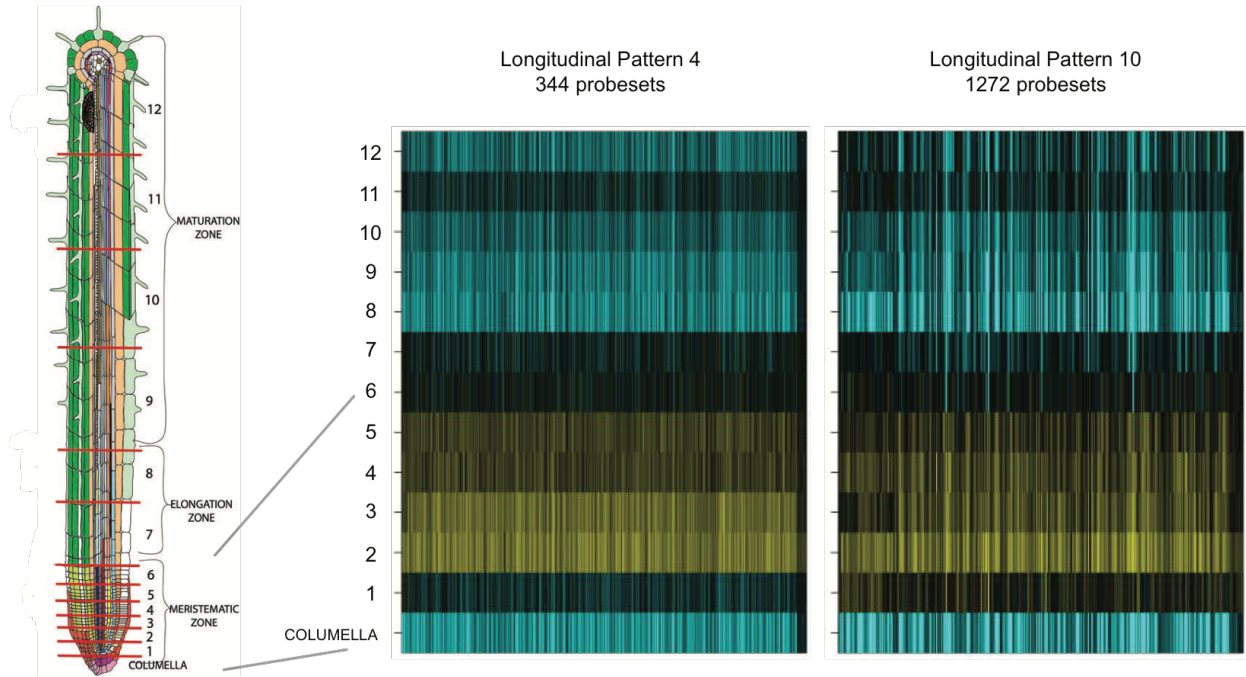

**Figure S4. TSO1 RNA expression in roots.**

Heatmap of two clusters of genes (cluster 4 and 10) showing highest expression in the meristematic zone (especially section 2 of the meristematic zone). TSO1 belongs to cluster 4 and 10. Series cross sections of the root were collected and subjected to transcriptome profiling using ATH1 DNA microarray<sup>1</sup>. Genes showing distinct expression pattern along the longitudinal axis of the root are clustered by fuzzy k-means clustering. The data and the root schematic drawing are from Brady et al. (2007)<sup>1</sup>.

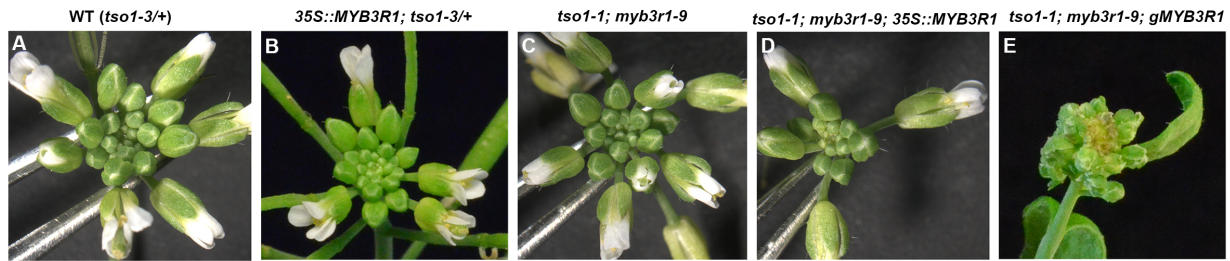

**Figure S5. The effect of 35S::MYB3R1 and gMYB3R1 transgenes in different backgrounds.**

- (A) Phenotypically wild type (WT) inflorescence of a *tso1-3/+* plant.
- (B) A 35S::MYB3R1; *tso1-3/+* transgenic plant showing a wild type phenotype.
- (C) A *tso1-1; myb3r1-9* double mutant inflorescence showing a wild type phenotype.
- (D) Inflorescence of a *tso1-1; myb3r1-9* double mutant showing the suppressed phenotype even in the presence of 35S::MYB3R1, indicating that 35S::MYB3R1 failed to rescue *myb3r1-9*.
- (E) Inflorescence of a *tso1-1; myb3r1-9* double mutant showing the *tso1-1* mutant phenotype in the presence of the gMYB3R1 transgene. This indicates that the gMYB3R1 transgene complemented the *myb3r1-9* mutation.

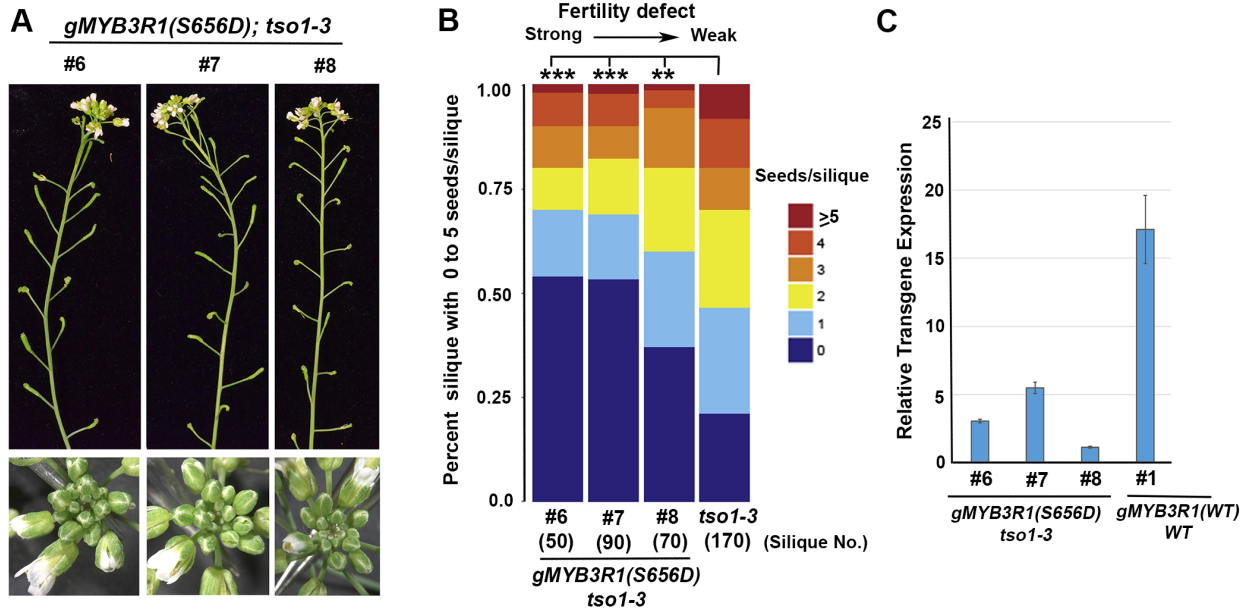

**Figure S6. Correlation between *gMYB3R1(S656D)* transgene expression and phenotype severity.**

(A) Inflorescence shoots showing the fertility defect of three different *gMYB3R1(S656D); tso1-3* transgenic lines.

(B) Quantitative measurement of the fertility defect (seeds per silique) in the three *gMYB3R1(S656D); tso1-3* transgenic lines in comparison to *tso1-3*. Total number of siliques analyzed per line (at 10 siliques per plant) is indicated beneath each column in parentheses. Enhanced sterility exhibited by each the three transgenic lines when compared with *tso1-3* is statistically significant, which is indicated by two asterisks ( $p \leq 0.01$ ) or three asterisks ( $p \leq 0.001$ ). The statistic test used is two-tailed two-sample t.test.

(C) qRT-PCR results showing relative transgene expression level in each of the three *gMYB3R1(S656D); tso1-3* transgenic lines. In addition, the wild type *gMYB3R1(WT)* transgene (line #1) did not cause any phenotypes even though it was expressed at a high level.

## Supplemental References

1 Brady et al. (2007) A high-resolution root spatiotemporal map reveals dominant expression patterns. *Science* 318(5851):801–806.



| <b>Table S1. Summary of <i>tso1-1</i> suppressors</b> |              |                           |                                     |                                              |                          |                 |  |
|-------------------------------------------------------|--------------|---------------------------|-------------------------------------|----------------------------------------------|--------------------------|-----------------|--|
| <b>Suppressor</b>                                     | <b>Gene</b>  | <b>Allele designation</b> | <b>Evidence</b>                     | <b>Base change</b>                           | <b>Amino acid change</b> | <b>Notation</b> |  |
| A156                                                  | TSO1         | tso1-7                    | Mapping                             | G-A splicing donor site of the 8th intron    |                          |                 |  |
| A176                                                  | TSO1         | tso1-8                    | Mapping                             | G-A splicing acceptor site of the 1st intron |                          |                 |  |
| B378                                                  | TSO1         | tso1-9                    | Complementation test                |                                              |                          |                 |  |
| A144                                                  | Chromosome 1 |                           | Mapping                             |                                              |                          |                 |  |
| A317                                                  | MYB3R1       | <i>myb3r1-14</i>          | Mapping                             | C-T / CGA-TGA                                | Arg-stop                 | R652X           |  |
| P29                                                   | MYB3R1       | <i>myb3r1-14</i>          | Complementation test                | C-T / CGA-TGA                                | Arg-stop                 | R652X           |  |
| B636                                                  | MYB3R1       | <i>myb3r1-9</i>           | Mapping                             | G-A / GGG-GAG                                | Gly-Glu                  | G119E           |  |
| B763                                                  | MYB3R1       | <i>myb3r1-12</i>          | Mapping                             | G-A / TGG-TGA                                | Trp-stop                 | W143X           |  |
| B12                                                   | MYB3R1       | <i>myb3r1-5</i>           | PCR_sequencing                      | G-A / GGa-AGA                                | Gly-Arg                  | G88R            |  |
| B845                                                  | MYB3R1       | <i>myb3r1-10</i>          | PCR_sequencing                      | G-A / CGC-CAC                                | Arg-His                  | R120H           |  |
| P17                                                   | MYB3R1       | <i>myb3r1-2</i>           | PCR_sequencing                      | C-T / CAA-TAA                                | Gln-stop                 | Q37X            |  |
| B846                                                  | MYB3R1       | <i>myb3r1-4</i>           | PCR_sequencing                      | C-T / GCT-GTT                                | Ala-Val                  | A62V            |  |
| P15                                                   | MYB3R1       | <i>myb3r1-4</i>           | PCR_sequencing                      | C-T / GCT-GTT                                | Ala-Val                  | A62V            |  |
| P19                                                   | MYB3R1       | <i>myb3r1-4</i>           | PCR_sequencing                      | C-T / GCT-GTT                                | Ala-Val                  | A62V            |  |
| P32                                                   | MYB3R1       | <i>myb3r1-4</i>           | PCR_sequencing                      | C-T / GCT-GTT                                | Ala-Val                  | A62V            |  |
| P34                                                   | MYB3R1       | <i>myb3r1-4</i>           | PCR_sequencing                      | C-T / GCT-GTT                                | Ala-Val                  | A62V            |  |
| B341                                                  | MYB3R1       | <i>myb3r1-4</i>           | Complementation test/PCR_sequencing | C-T / GCT-GTT                                | Ala-Val                  | A62V            |  |
| B667                                                  | MYB3R1       | <i>myb3r1-11</i>          | Complementation test/PCR_sequencing | G-A / TGT-TAT                                | Cys-Tyr                  | C125Y           |  |
| B759                                                  | MYB3R1       | <i>myb3r1-6</i>           | Complementation test/PCR_sequencing | G-A / TGG-TGA                                | Trp-stop                 | W90X            |  |
| P11                                                   | MYB3R1       | <i>myb3r1-8</i>           | Complementation test/PCR_sequencing | G-A / GAT-AAT                                | Asp-Asn                  | D95N            |  |
| B741                                                  | MYB3R1       | <i>myb3r1-13</i>          | Complementation test/PCR_sequencing | G-A / GAG-AAG                                | Glu-Lys                  | E146K           |  |

|      |                |                 |                                     |                                                                                         |                      |  |
|------|----------------|-----------------|-------------------------------------|-----------------------------------------------------------------------------------------|----------------------|--|
| P3   | MYB3R1         | <i>myb3r1-7</i> | Complementation test/PCR_sequencing | G-A splicing donor site of the 5th intron and the 6th exon/AAGAGgtgatttt/tttgaagGAGGATA | premature stop codon |  |
| P7   | MYB3R1         | <i>myb3r1-3</i> | Complementation test/PCR_sequencing | G-A splicing acceptor site of the 3rd intron/gatcagGACGA                                | premature stop codon |  |
| P8   | MYB3R1         | <i>myb3r1-3</i> | Complementation test/PCR_sequencing | G-A splicing acceptor site of the 3rd intron/gatcagGACGA                                | premature stop codon |  |
| P9   | MYB3R1         | <i>myb3r1-3</i> | Complementation test/PCR_sequencing | G-A splicing acceptor site of the 3rd intron/gatcagGACGA                                | premature stop codon |  |
| P10  | MYB3R1         | <i>myb3r1-3</i> | Complementation test/PCR_sequencing | G-A splicing acceptor site of the 3rd intron/gatcagGACGA                                | premature stop codon |  |
| P12  | MYB3R1         | <i>myb3r1-3</i> | Complementation test/PCR_sequencing | G-A splicing acceptor site of the 3rd intron/gatcagGACGA                                | premature stop codon |  |
| A40  | MYB3R1         |                 | Complementation test                |                                                                                         |                      |  |
| B447 | MYB3R1         |                 | Complementation test                |                                                                                         |                      |  |
| B478 | MYB3R1         |                 | Complementation test                |                                                                                         |                      |  |
| B783 | MYB3R1         |                 | Complementation test                |                                                                                         |                      |  |
| P18  | MYB3R1         |                 | Complementation test                |                                                                                         |                      |  |
| P20  | MYB3R1         |                 | Complementation test                |                                                                                         |                      |  |
| P21  | MYB3R1         |                 | Complementation test                |                                                                                         |                      |  |
| P22  | MYB3R1         |                 | Complementation test                |                                                                                         |                      |  |
| P30  | MYB3R1         |                 | Complementation test                |                                                                                         |                      |  |
| B701 | Not determined |                 |                                     |                                                                                         |                      |  |
| P13  | Not determined |                 |                                     |                                                                                         |                      |  |
| P14  | Not determined |                 |                                     |                                                                                         |                      |  |
| P4   | Not determined |                 |                                     |                                                                                         |                      |  |
| P6   | Not determined |                 |                                     |                                                                                         |                      |  |
| B847 | Not determined |                 |                                     |                                                                                         |                      |  |
| P5   | Not determined |                 |                                     |                                                                                         |                      |  |
| P16  | Not determined |                 |                                     |                                                                                         |                      |  |

**Table S2. Summary of transgenic studies using 35S::MYB3R1 and gMYB3R1**

| Background                     | Transgene →                     | 35S::MYB3R1                      | gMYB3R1 <sup>^</sup>    | gMYB3R1 (S656D) <sup>^</sup> | gMYB3R1 (S709D) <sup>^</sup> |
|--------------------------------|---------------------------------|----------------------------------|-------------------------|------------------------------|------------------------------|
| WT*                            | Transgenic phenotype            | Same as WT                       | Same as WT              | Same as WT                   | Same as WT                   |
|                                | No. lines analyzed <sup>#</sup> | 12                               | 10                      | 8                            | 2                            |
| <i>tso1-3</i>                  | Transgenic phenotype            | Same as <i>tso1-3</i>            | Same as <i>tso1-3</i>   | Stronger than <i>tso1-3</i>  | Same as <i>tso1-3</i>        |
|                                | No. lines analyzed <sup>#</sup> | 10                               | 2                       | 3                            | 4                            |
| <i>tso1-1; myb3r1-9</i> (B636) | Transgenic phenotype            | Failed to rescue <i>myb3r1-9</i> | Rescued <i>myb3r1-9</i> | NA                           | NA                           |
|                                | No. lines analyzed <sup>#</sup> | 4                                | 2                       |                              |                              |

\* Phenotypically wild type plants either heterozygous for *tso1* or +/+.

<sup>^</sup> These *gMYB3R1* transgenes are all tagged by GFP

<sup>#</sup> At least 20 T1 transgenic lines were generated for each construct. These transgenic lines showed the phenotype indicated in the table. The indicated number of lines refers to the number of lines further analyzed and documented.

| <b>Table S3. Primers used in this study</b> |                                         |                        |                                                |
|---------------------------------------------|-----------------------------------------|------------------------|------------------------------------------------|
| <b>Primer name</b>                          | <b>Sequence</b>                         | <b>Construct</b>       | <b>Purpose</b>                                 |
| TSO1-GR.F                                   | cgcggatcctATGgacaaatcccagaagaatc        | 35S::TSO1-GR           | Inducible TSO1-GR system                       |
| TSO1-GR.R                                   | cgcggatcctaCActgattgggtgagaga           | 35S::TSO1-GR           |                                                |
| TSO1.geno.F                                 | ATAAGCTTCACCTTGCTGTTCCAAGACAC           |                        | TSO1 translational reporter                    |
| TSO1.geno.R                                 | CTGATTTGGGTTGAGAGAAGGAAATGC             |                        |                                                |
| BamHI-TSO1-F                                | CTCGGATCCATGGACAAATCCCAGAAG             |                        | PHB-FLAG-TSO1 vector for Co-IP                 |
| Spe1-TSO1-R                                 | CTGACTAGTCACTGATTGGGTTGAGA              |                        |                                                |
| TSO1.3xGFP.n.R                              | TGATTTGGGTTGAGAGAAGGAAATGC              |                        | TSO1-NLS-3xeGFP vector                         |
| AtU6P-F                                     | TGGGTCGACGTAAGCCTGTAGAAGAGGT            | MYB3R1.CRISPR4         | MYB3R1 CRISPR construct targeting the 4th exon |
| U6P-MYB3R1-4E-R                             | GCTTGTGAAAGGACCGTCAATCACTACTTCGACTCTAGC | MYB3R1.CRISPR4         |                                                |
| U6T-MYB3R1-4E-F                             | GTCCTTTCACAAGCTCTGTTTTAGAGCTAGAAATAGCAA | MYB3R1.CRISPR4         |                                                |
| AtU6T-R                                     | ATTGGTACCAAAAATTATATCCTGTGGTCGTATATTA   | MYB3R1.CRISPR4         |                                                |
| pMYB3R1.F                                   | AACTGCAGTATTAGCCAATGAAGGTGGACTAGC       | pMYB3R1:GUS            | MYB3R1 promoter                                |
| pMYB3R1.R                                   | AAGTCGACAATTAAGACGCTGAGAATCCAGATG       | pMYB3R1:GUS            |                                                |
| pMYB3R4.F                                   | AACTGCAGAGTCGGTAACATTCTGCCAGAGATG       | pMYB3R4:GUS            | MYB3R4 promoter                                |
| pMYB3R4.R                                   | AAGTCGACGAGCTTCAGAAATGGAAGTGGTTC        | pMYB3R4:GUS            |                                                |
| MYB3R1 .F                                   | ATGAAGCGTGAGATGAAAGCAC                  | 35S::YFP-MYB3R1        | YFP-MYB3R1 vector of Co-IP                     |
| MYB3R1 .R                                   | CTATCTGCAACTCTTCAAAAGGTAAGATG           |                        |                                                |
| S656D.F                                     | AGACTTGCTTGACCCTGTGCTTGATAG             | 35S::MYB3R1-S656D      | S656D phospho mimiking                         |
| S656D.R                                     | CGATGCCGCTTCTTTAAG                      |                        |                                                |
| S709D.F                                     | TATATGTGCCGACCCTTCCATAGC                | 35S::MYB3R1-S709D      | S709D phospho mimiking                         |
| S709D.R                                     | TTTTTATCTTCAGGAGACTCTG                  |                        |                                                |
| MYB3R4.CRISPR.F                             | ATTGTGCGAGGCCAATGGACAGCTG               | MYB3R4.2nd.exon.CRISPR | MYB3R4 CRISPR construct targeting the 2nd exon |
| MYB3R4.CRISPR.R                             | AAACCAGCTGTCCATTGGCCTCGA                |                        |                                                |
| MYB3R1.3xGFP.n.R                            | CTGCAACTCTTCAAAAGGTAAGATGAT             | gTSO1-NLS-3xeGFP       | gTSO1-NLS-3xeGFP translational reporter        |
| qPCR.GFP.R                                  | CTCCAGTGAAAAGTTCTTCTCC                  |                        | qPCR for gMYB3R1-GFP transgene                 |
| qPCR.MYB3R1.F                               | TGAGTGAACACTCAGCTACGG                   |                        | qPCR for gMYB3R1-GFP transgene                 |
| AtUBC9-F                                    | CAGTGGAGTCTGCTCTCACAA                   |                        | qPCR reference gene control                    |
| AtUBC9-R                                    | CATCTGGGTTGGATCCGTTA                    |                        | qPCR reference gene control                    |

**Table S4. Summary of Illumina DNA-seq data**

|                                 | <b>Number of plants pooled</b> | <b>Reads in fastq</b> | <b>Mapped reads</b> | <b>overall alignment rate</b> | <b>aligned exactly 1 time</b> | <b>aligned &gt;1 times</b> |
|---------------------------------|--------------------------------|-----------------------|---------------------|-------------------------------|-------------------------------|----------------------------|
| A176NS                          | 50                             | 37,881,321            | 35,463,736          | 93.62%                        | 24532907 (64.76%)             | 10930829 (28.86%)          |
| A176S                           | 34                             | 36,524,977            | 34,251,910          | 93.78%                        | 24009642 (65.73%)             | 10242268 (28.04%)          |
| A317NS                          | 50                             | 36,897,865            | 34,419,918          | 93.28%                        | 24392999 (66.11%)             | 10026919 (27.17%)          |
| A317S                           | 30                             | 43,189,889            | 40,344,914          | 93.41%                        | 28756191 (66.58%)             | 11588723 (26.83%)          |
| TSO1-GR                         | 3                              | 24,660,032            | 22,232,665          | 90.16%                        | 14319121 (58.07%)             | 7913544 (32.09%)           |
| A144S                           | 50                             | 46,538,146            | 43,500,250          | 93.47%                        | 31742725 (68.21%)             | 11757525 (25.26%)          |
| B636S                           | 50                             | 42,847,379            | 39,978,013          | 93.30%                        | 28047532 (65.46%)             | 11930481 (27.84%)          |
| B763S                           | 50                             | 41,198,897            | 38,654,995          | 93.83%                        | 26643726 (64.67%)             | 12011269 (29.15%)          |
| A156S                           | 50                             | 43,989,567            | 41,090,565          | 93.41%                        | 30646817 (69.67%)             | 10443748 (23.74%)          |
|                                 |                                |                       |                     |                               |                               |                            |
| NS: Non-suppressed F2 progenies |                                |                       |                     |                               |                               |                            |
| S: Suppressed F2 progenies      |                                |                       |                     |                               |                               |                            |
